# Supplementary material for: Trifluoromethylated cyclic-ADP-ribose mimic: synthesis of 8-trifluoromethyl-N1-[(5′′-O-phosphorylethoxy)methyl]-5′-O-phosphorylinosine-5′,5′′-cyclic pyrophosphate (8-CF3-cIDPRE) and its calcium release activity in T cells
Source: Royal Society of Chemistry journal article supplement (doi:10.1039/c0ob00090f), 2010-01-01

# Supporting Information

**Trifluoromethylated Cyclic-ADP- Ribose Mimic: Synthesis of 8-trifluoromethyl- $N^1$ -[(5''-O-Phosphorylethoxy)methyl]-5'-O-phosphorylinosine-5',5''-Cyclic pyrophosphate (8-CF<sub>3</sub>-cIDPRE) and its calcium release activity in T Cells**

*Min Dong; Tanja Kirchberger; Xiang Chen Huang; Zhen Jun Yang; Liang*

*Ren Zhang; Andreas H Guse; Li He Zhang<sup>§</sup>*

e-mail:zdszlh@bjmu.edu.cn

## Table of Contents

<sup>1</sup>H, <sup>19</sup>F, <sup>31</sup>P-NMR Spectra of 13 (S2-S4)

<sup>1</sup>H, <sup>19</sup>F, <sup>31</sup>P-NMR Spectra of 14 (S5-S7)

<sup>1</sup>H, <sup>19</sup>F, <sup>31</sup>P-NMR Spectra of 1 (S8-S10)

HPLC for 14, 1 (S11)

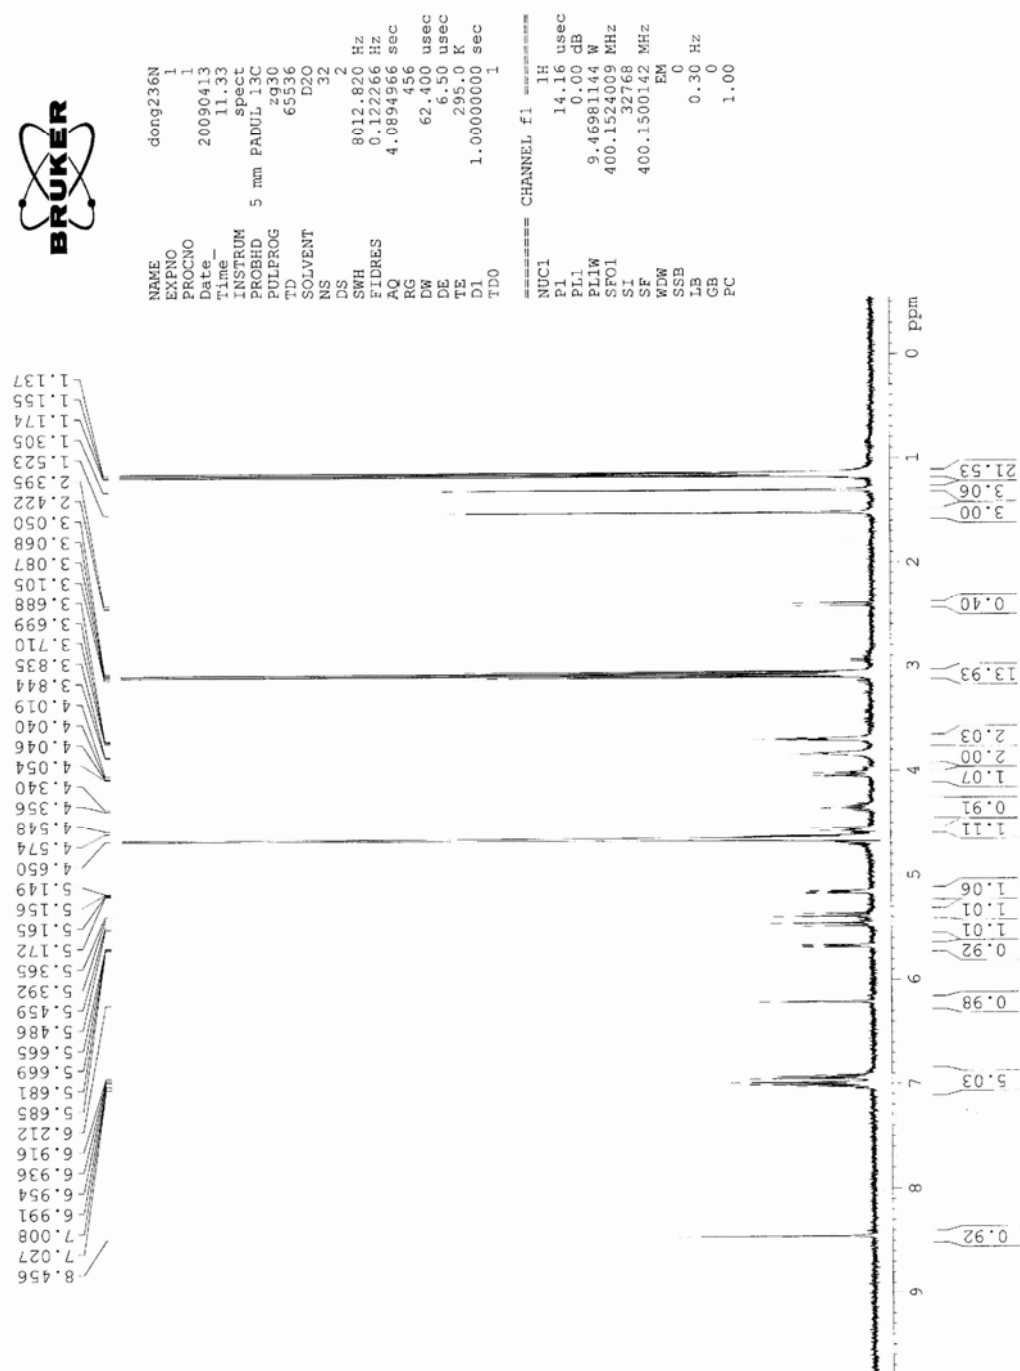

Figure S1.1.  $^1\text{H}$  NMR Spectrum of 13

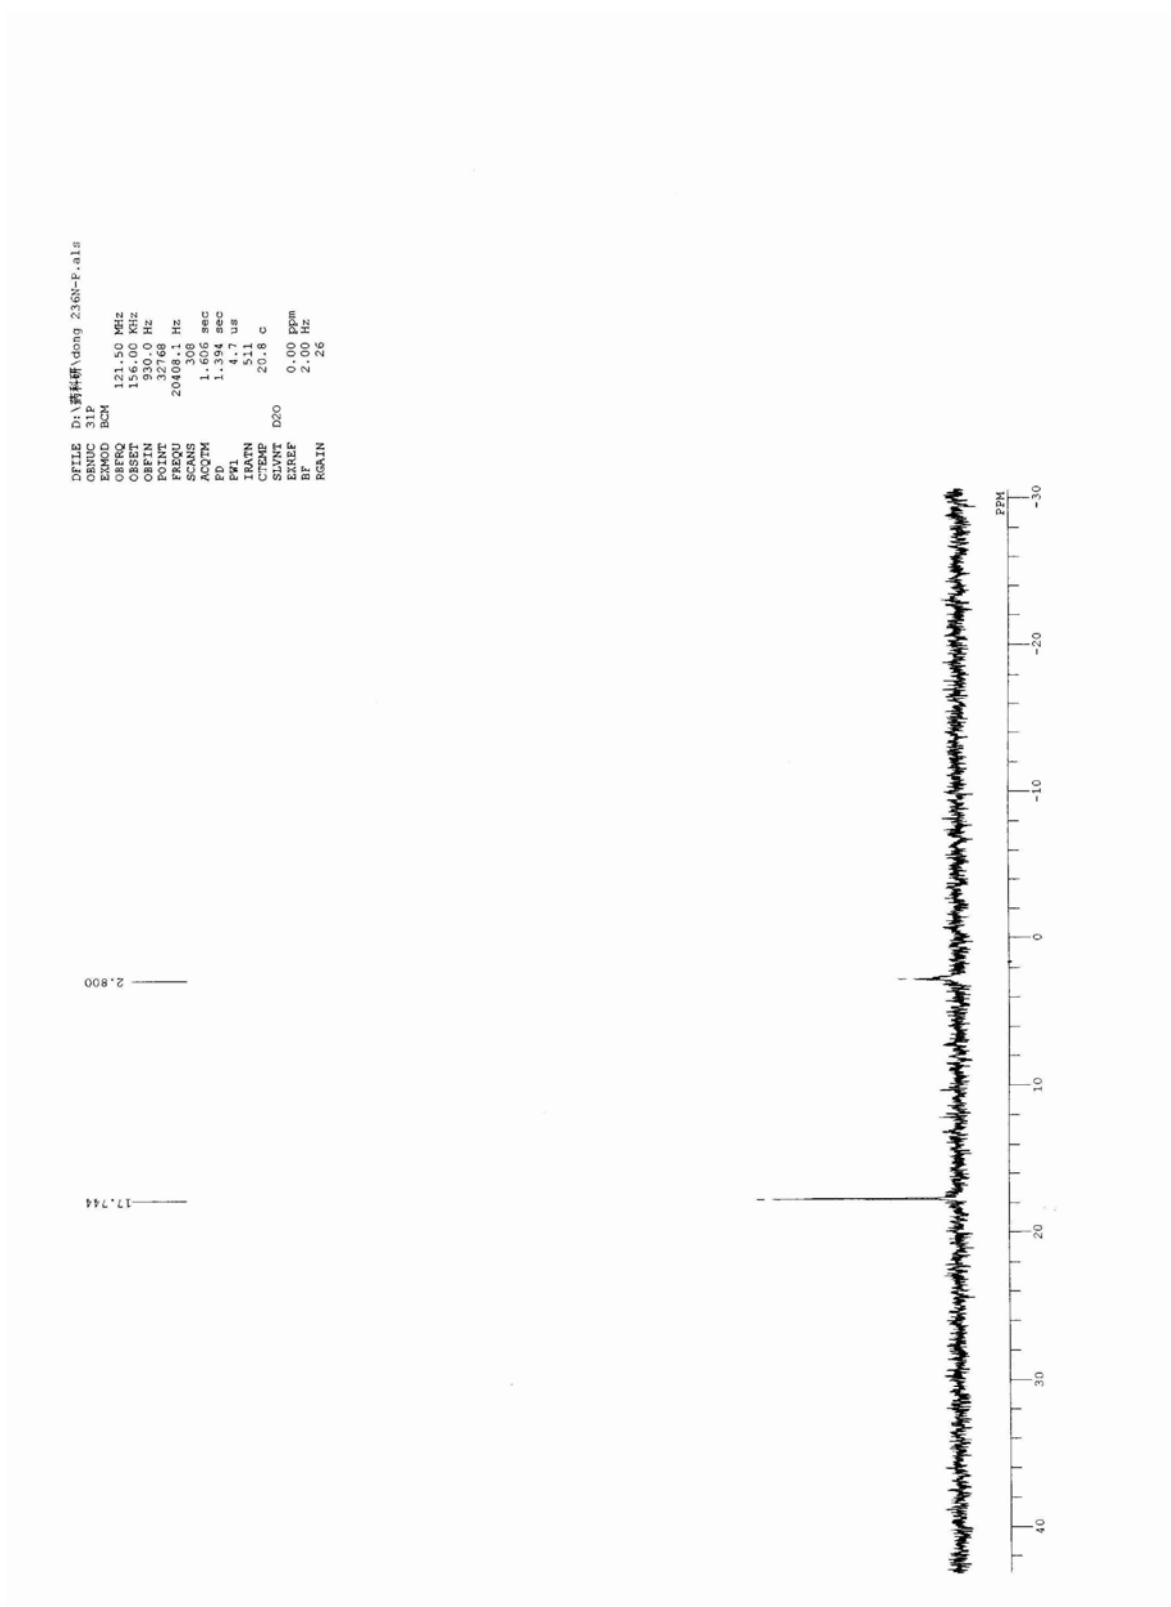

Figure S1.2.  $^{31}\text{P}$  NMR Spectrum of 13

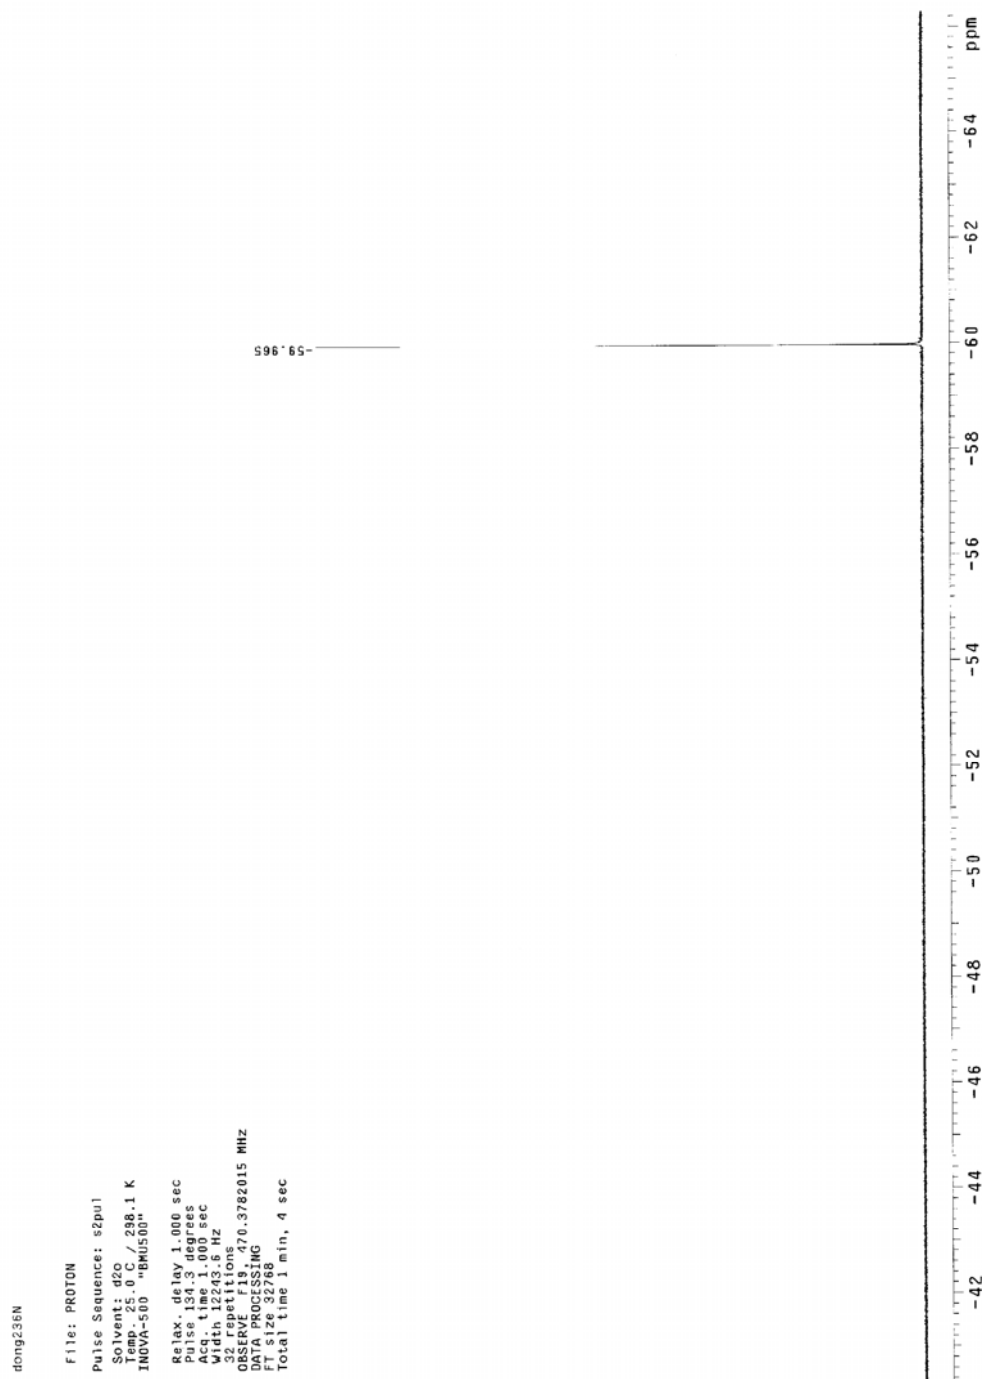

Figure S1.3.  $^{19}\text{F}$  NMR Spectrum of **13**

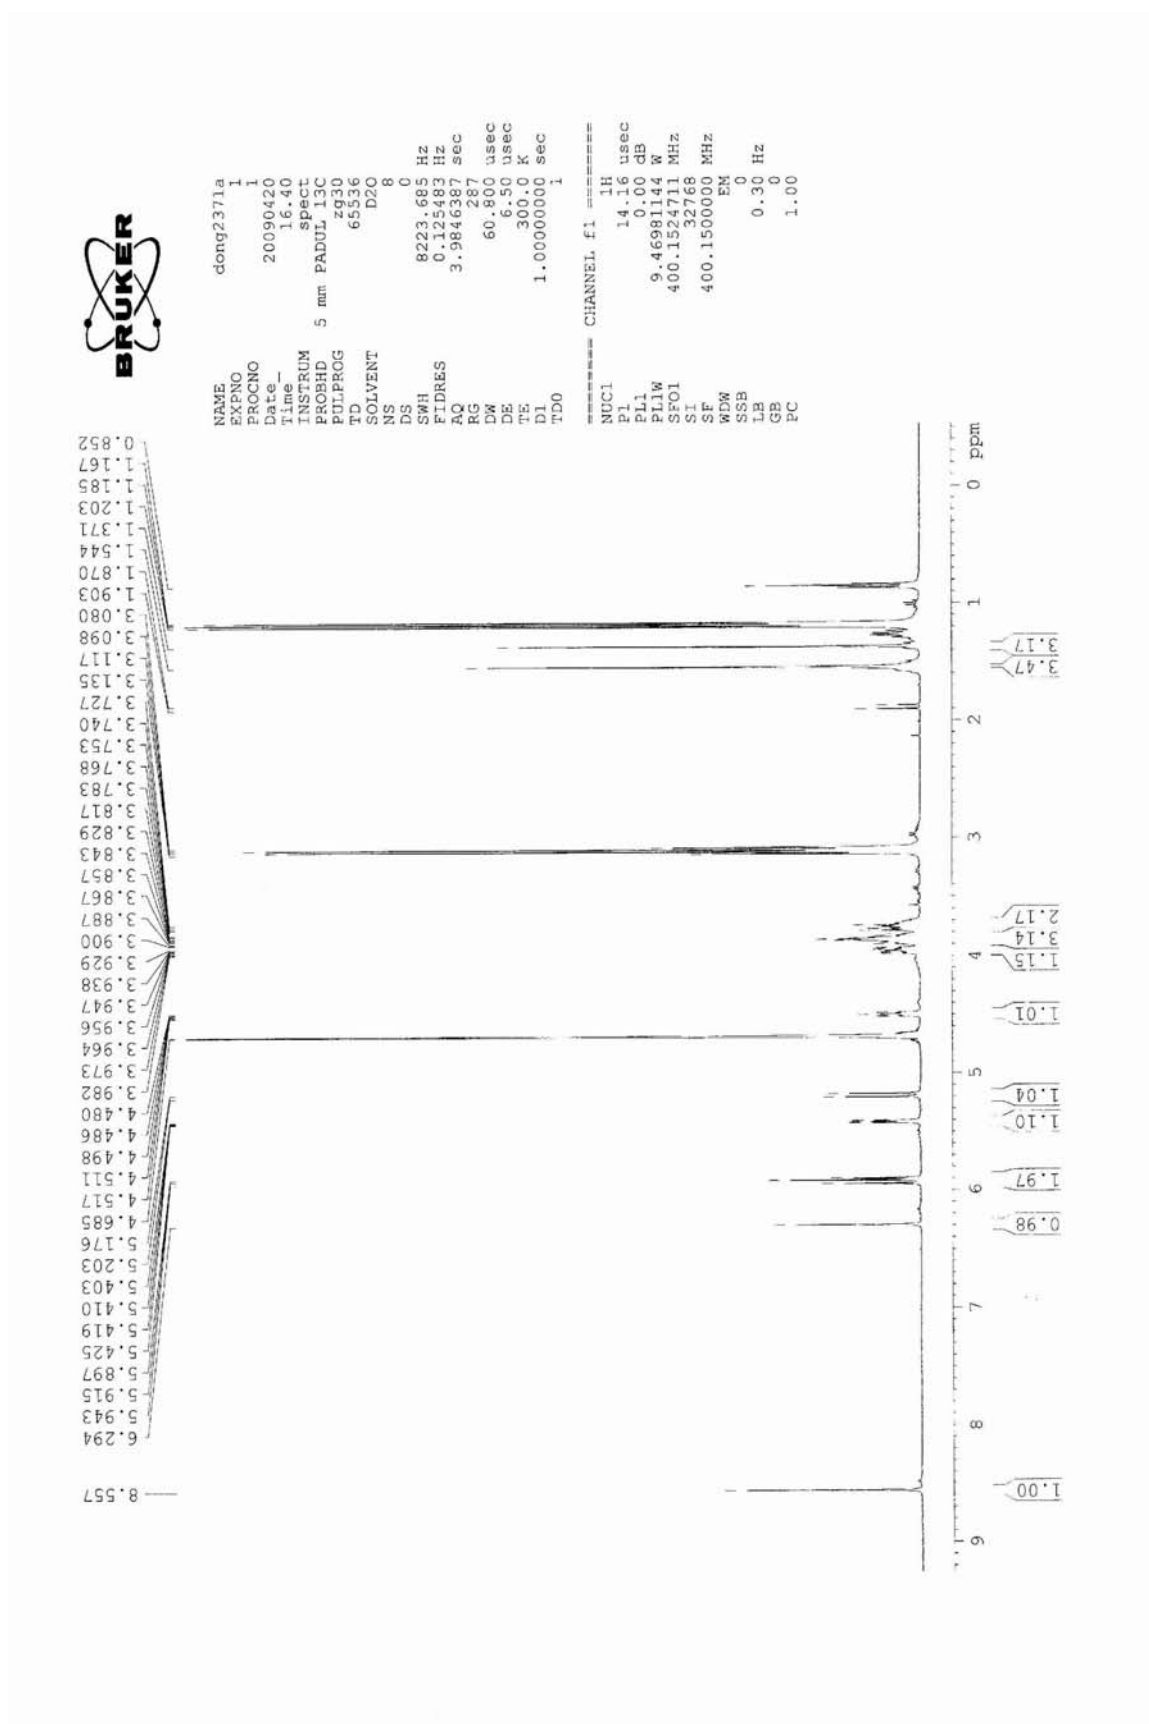

Figure S2.1.  $^1\text{H}$  NMR Spectrum of 14

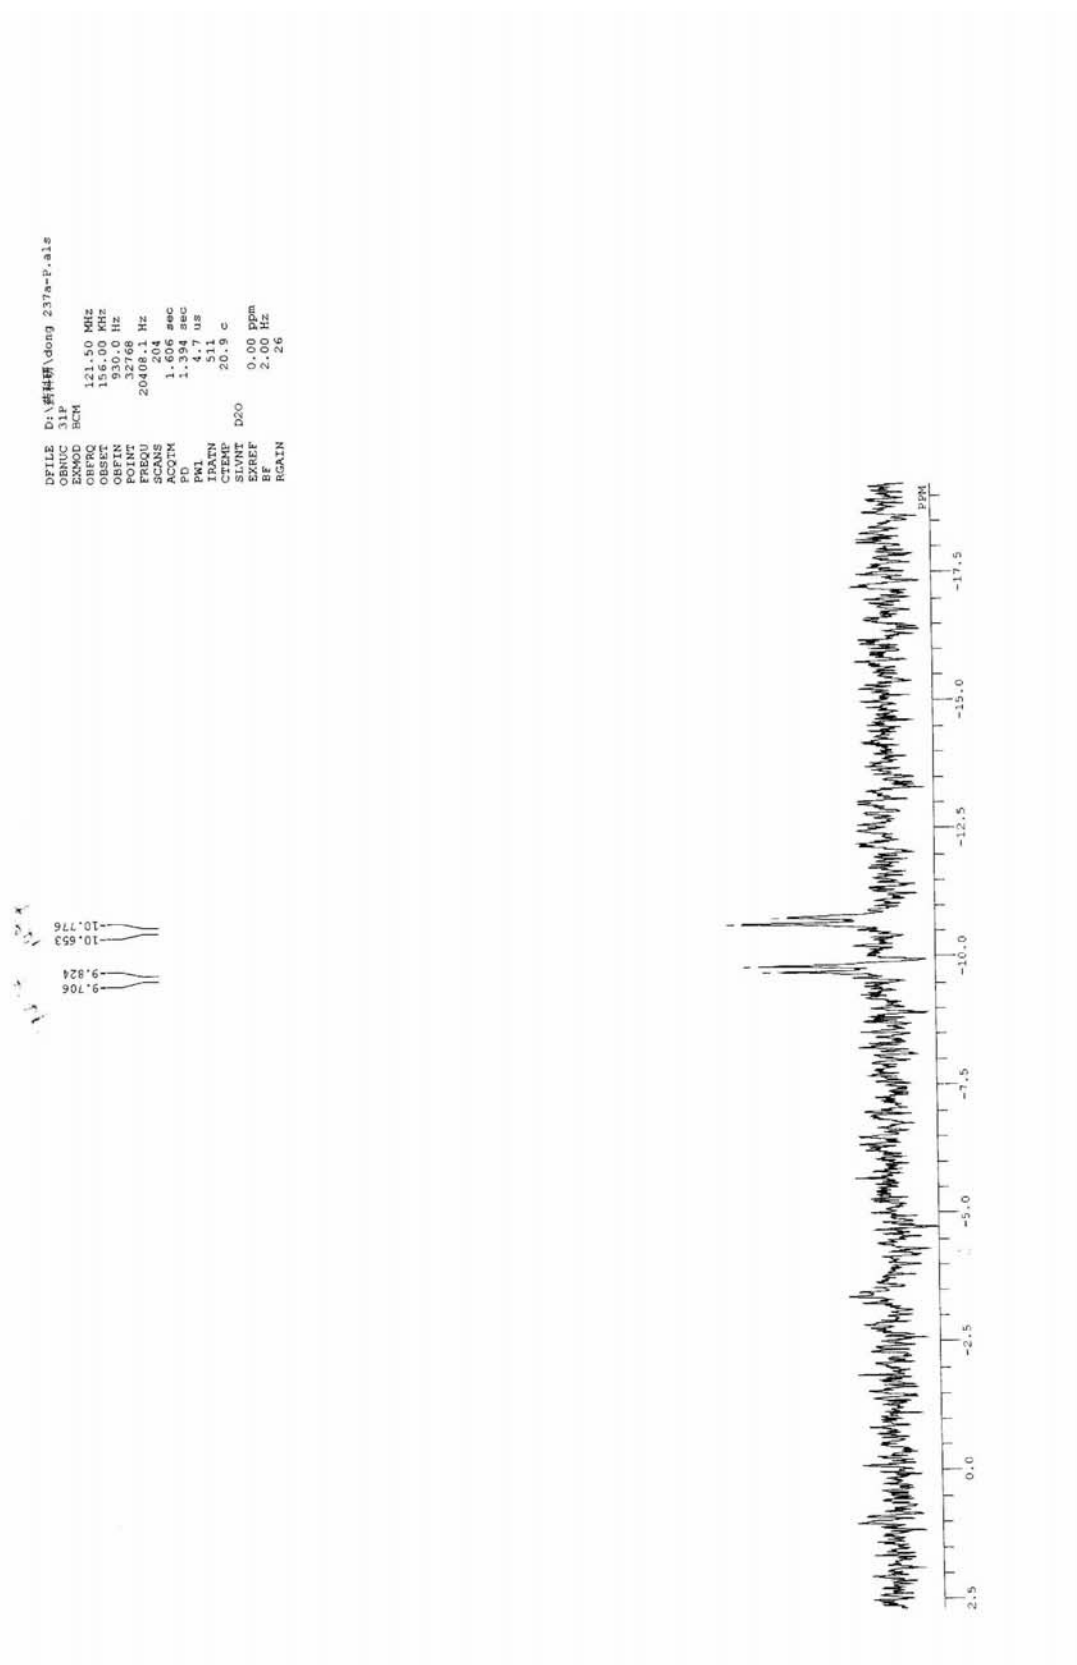

Figure S2.2.  $^{31}\text{P}$  NMR Spectrum of 13

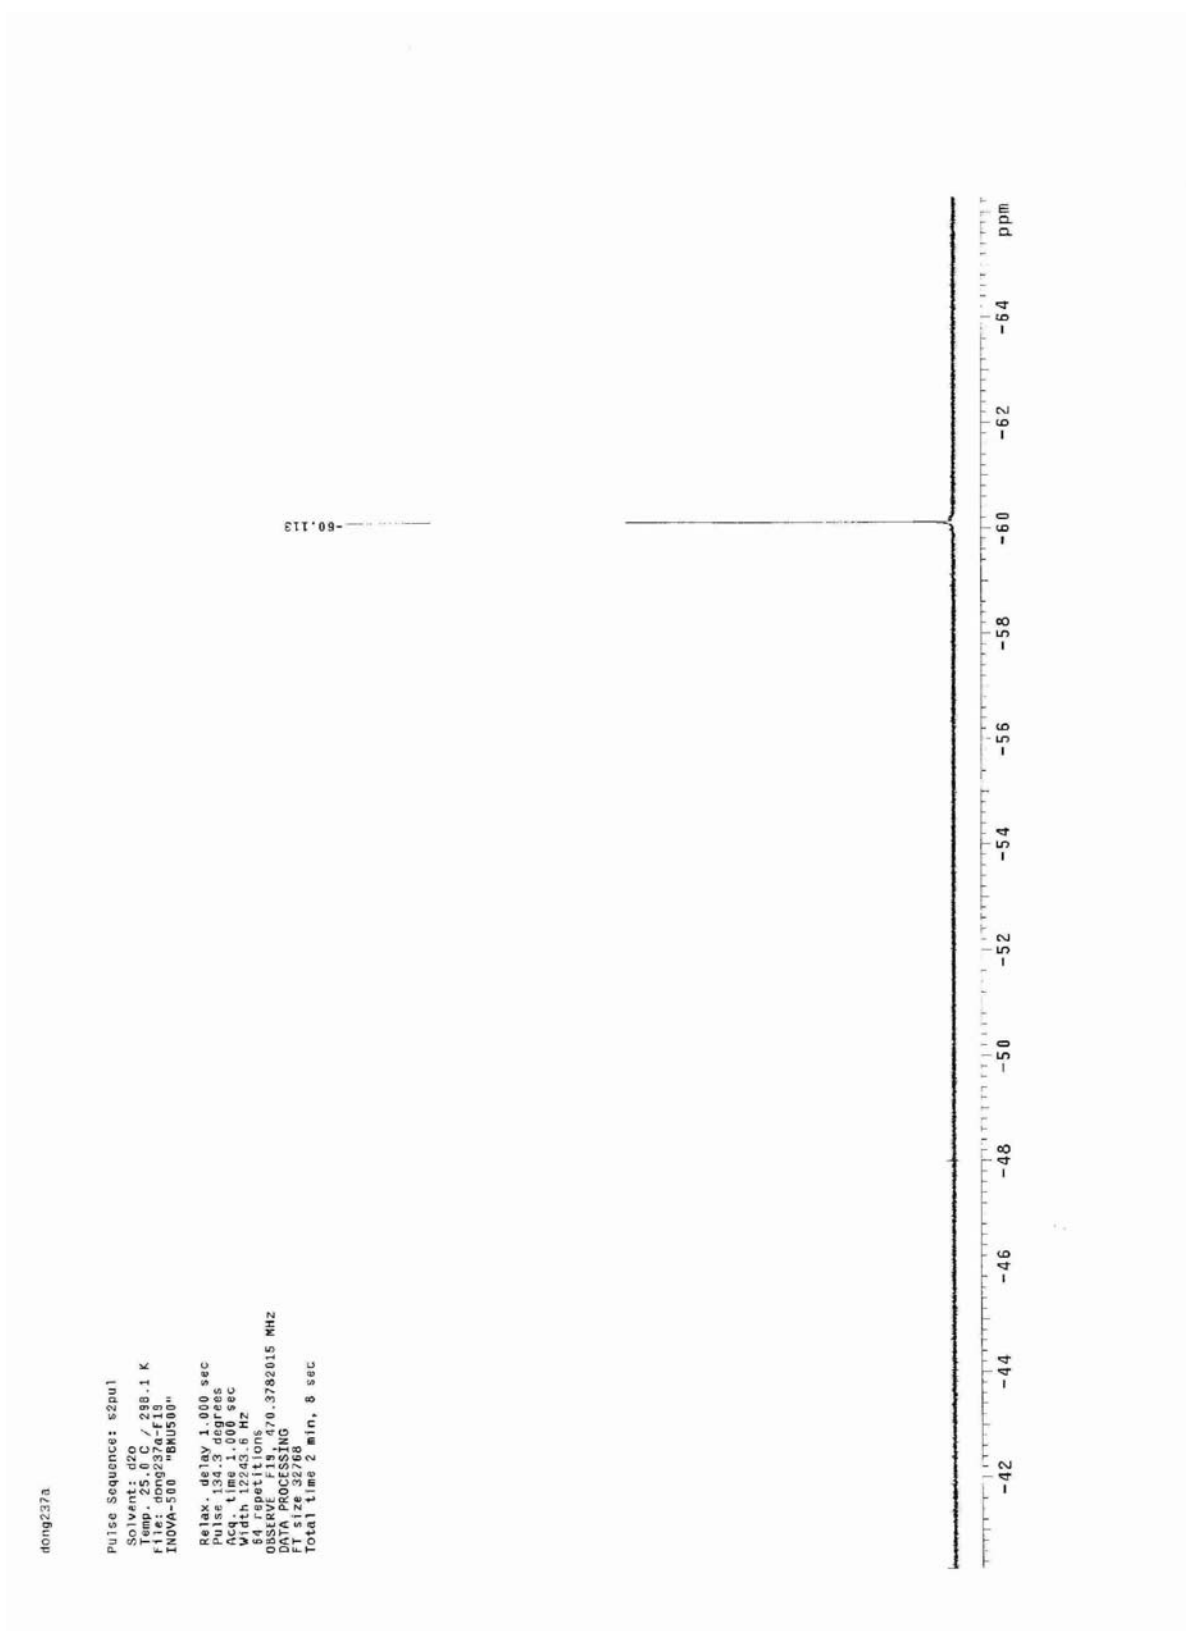

Figure S2.3.  $^{19}\text{F}$  NMR Spectrum of **14**

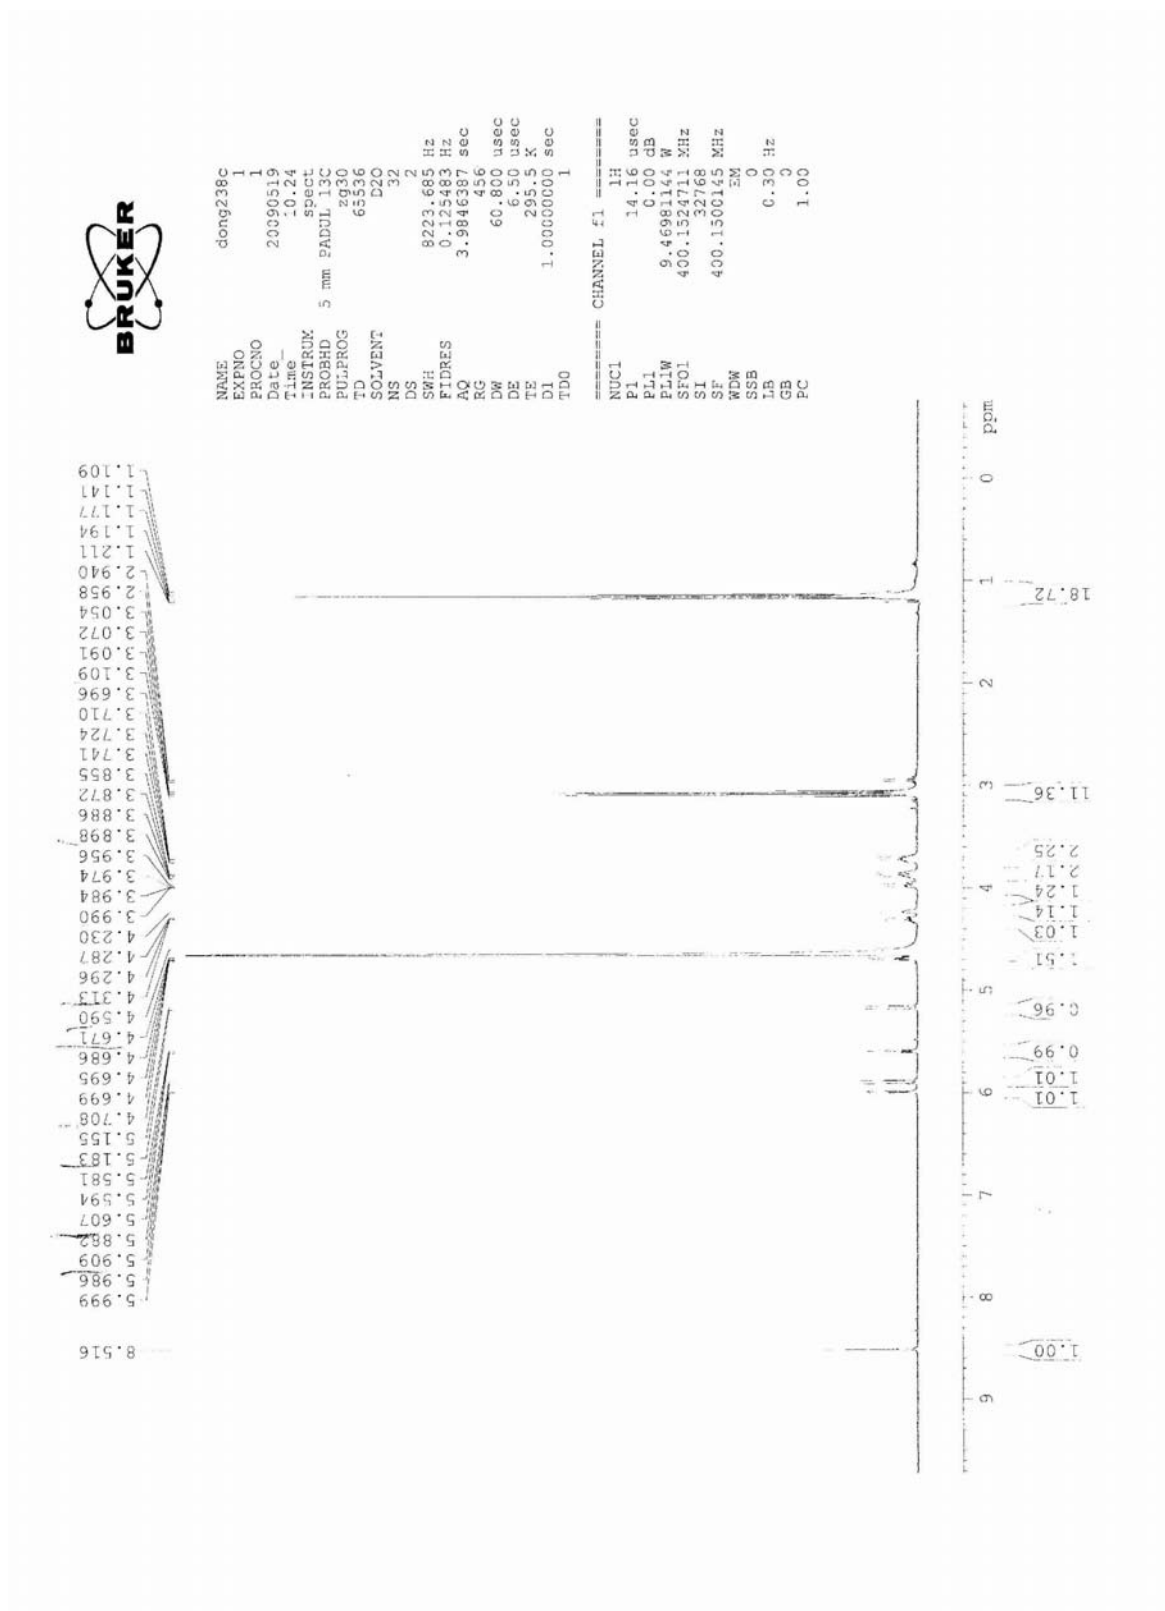

Figure S3.1.  $^1\text{H}$  NMR Spectrum of 1



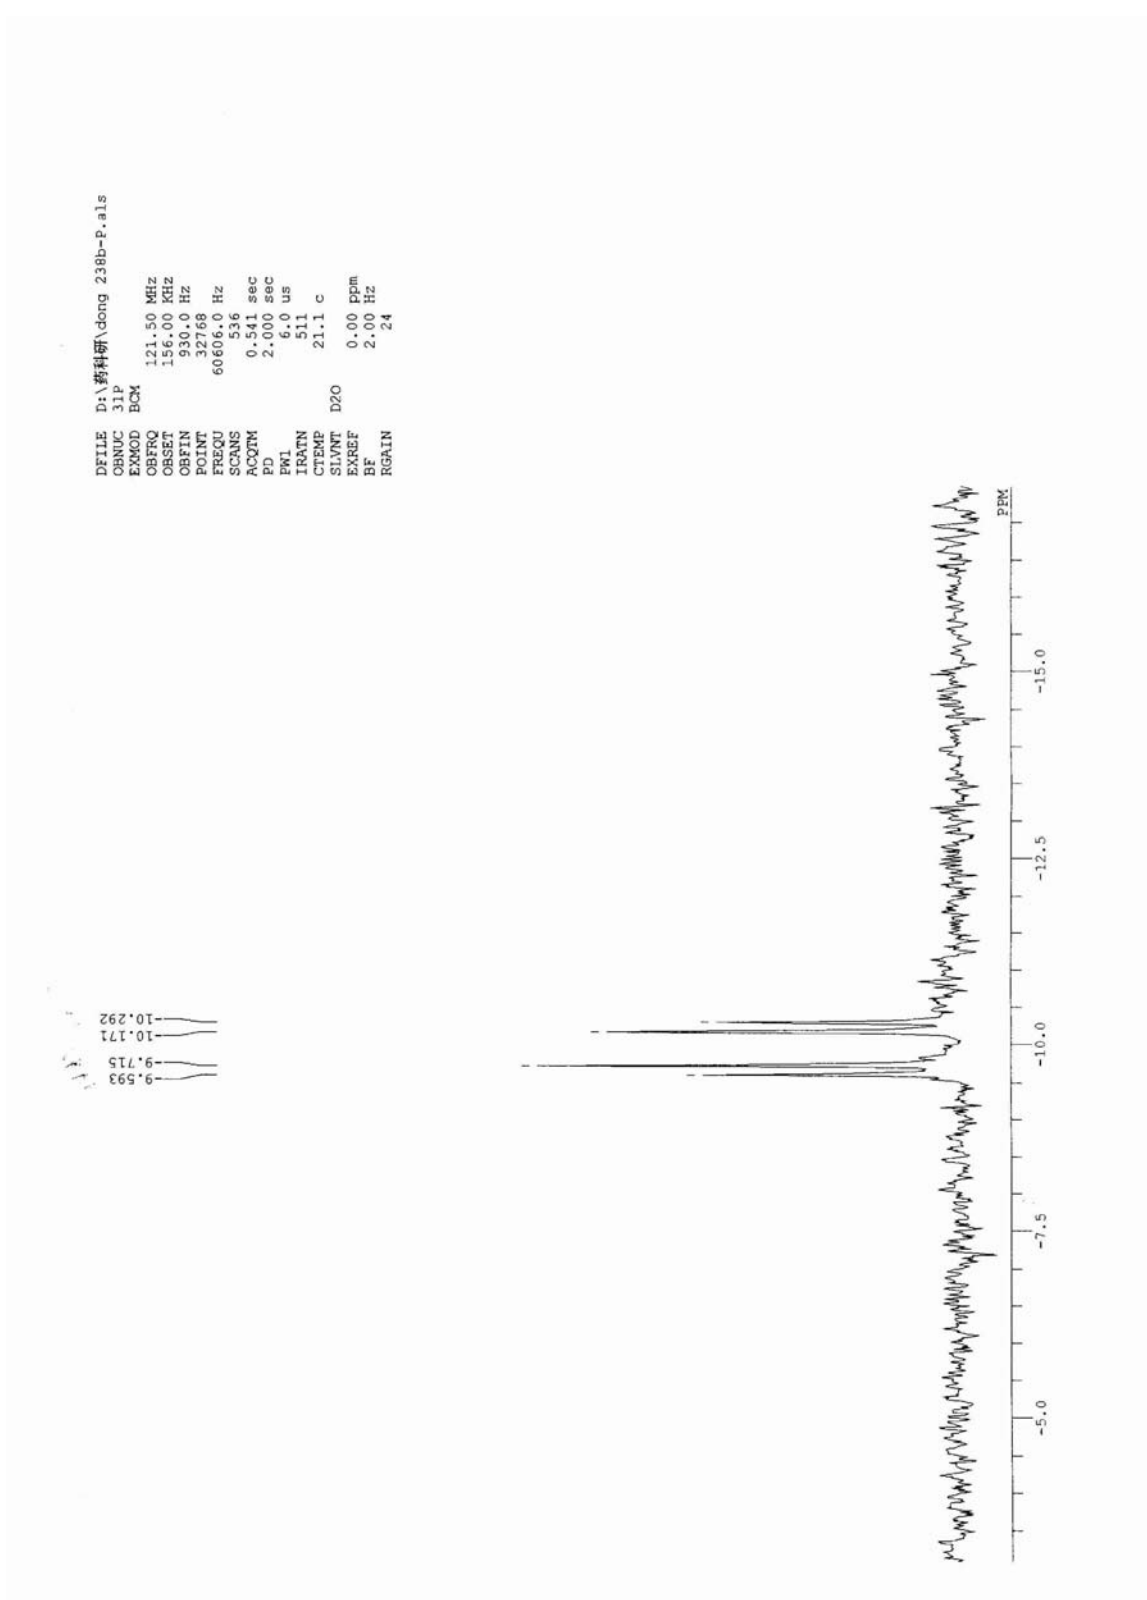

Figure S3.2.  $^{31}\text{P}$  NMR Spectrum of **1**

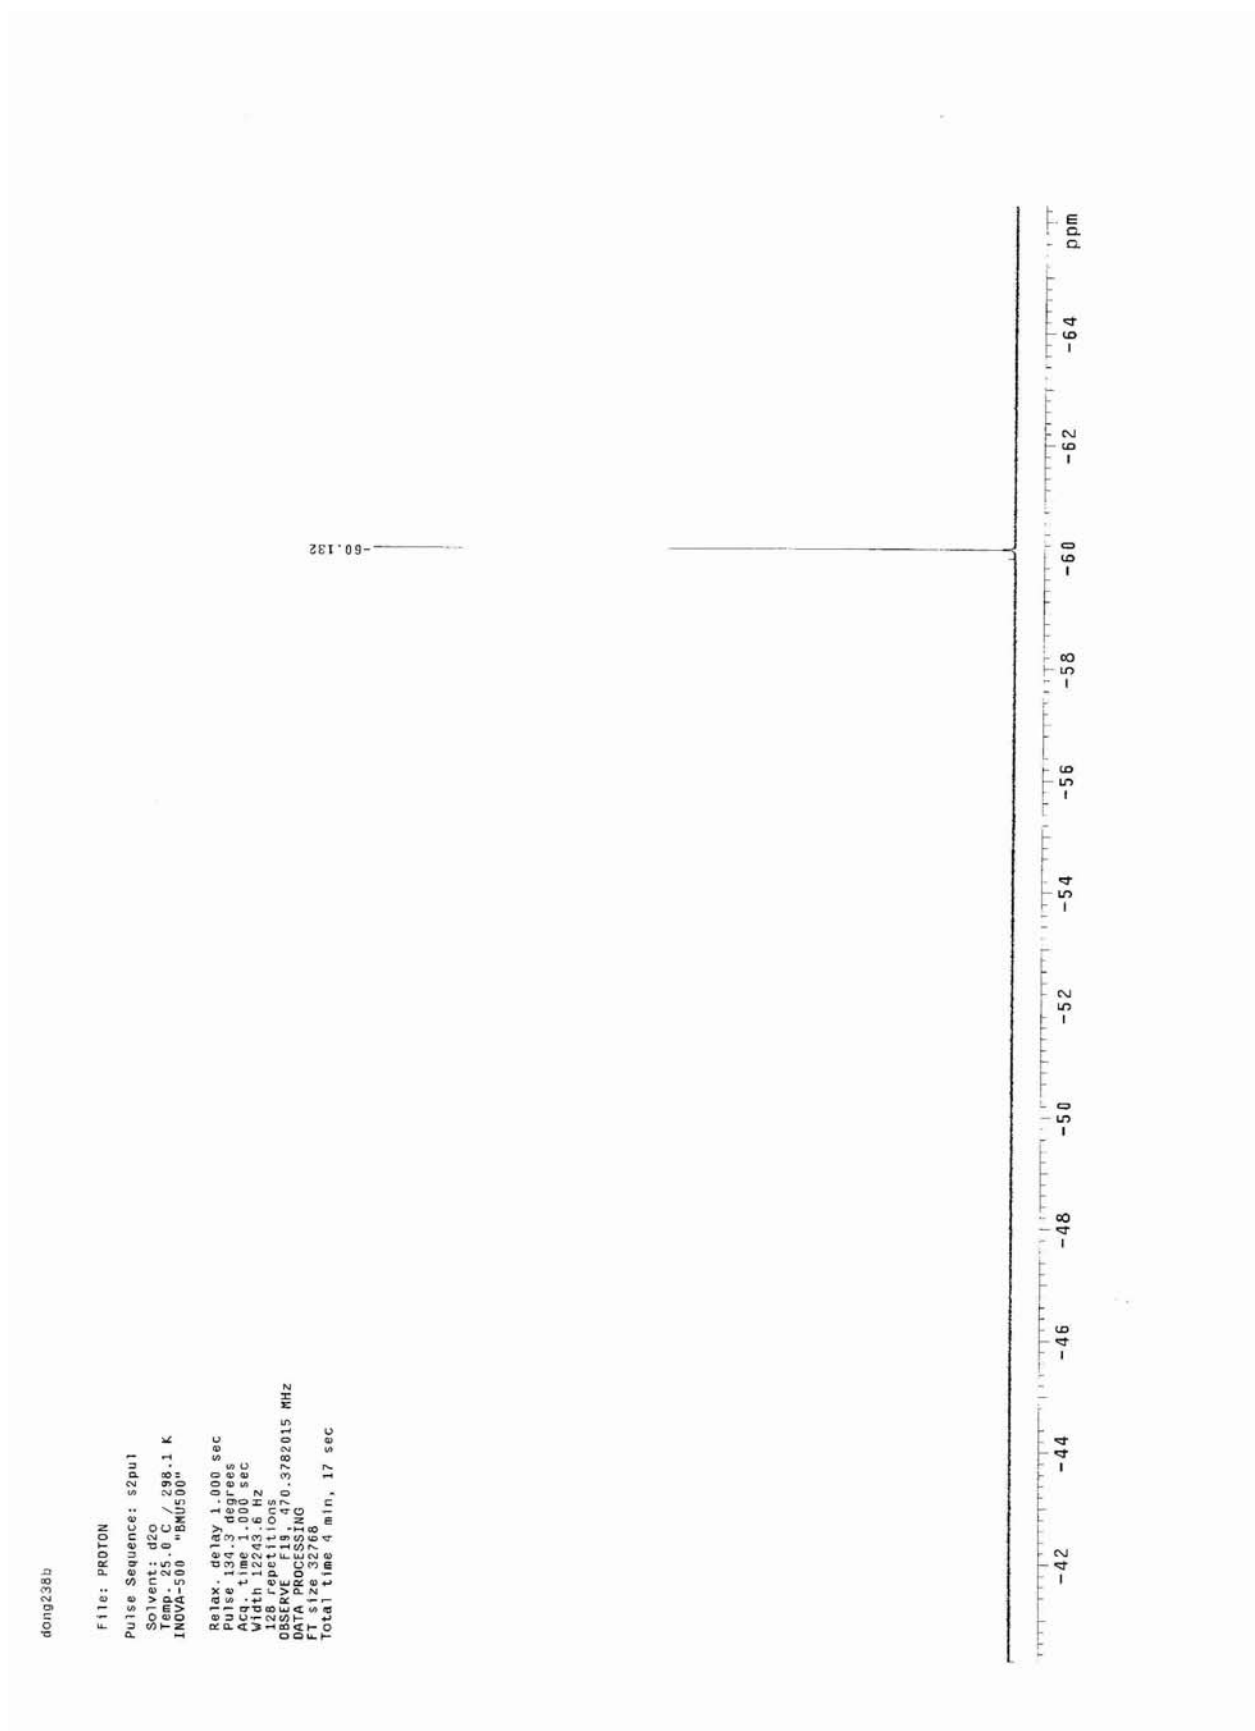

Figure S3.3.  $^{19}\text{F}$  NMR Spectrum of **1**

## HPLC For 14

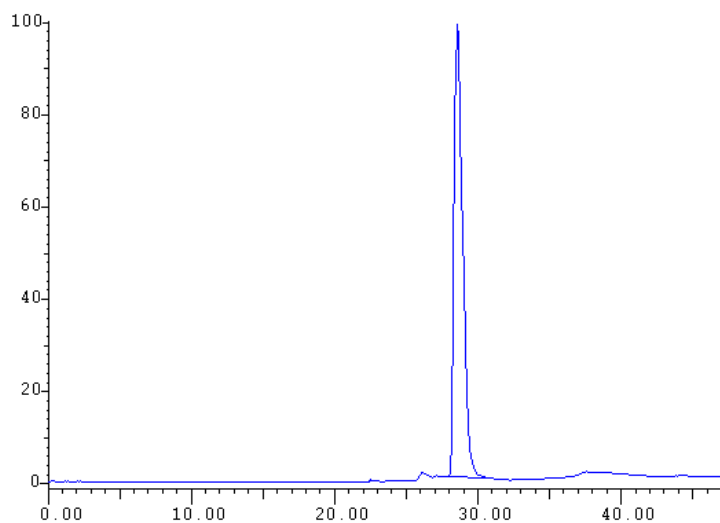

## HPLC For 1

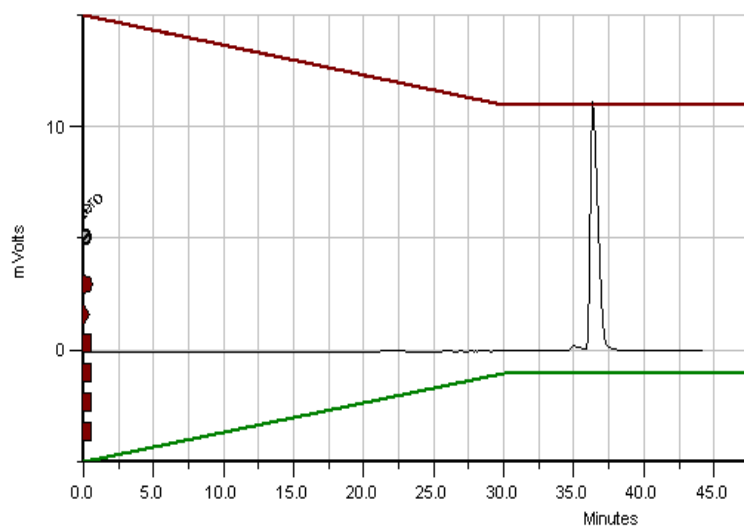

Supplement: c0ob00090f.pdf [file c0ob00090f.pdf]
